# Supplementary material for: The SIESTA (SEAAV Integrated evaluation sedation tool for anaesthesia) project: Initial development of a multifactorial sedation assessment tool for dogs
Source: PubMed Central journal article supplement (PMC7112187; doi:10.1371/journal.pone.0230799), 2020-04-01
Supplement: pone.0230799.s002.pdf [file pone.0230799.s002.pdf]

DATOS

| Degree    | Alertness | Head Elevation | Posture  | Demenour  | Ataxia |
|-----------|-----------|----------------|----------|-----------|--------|
| GRADO     | ALERTA    | CABEZA         | POSTURA  | MENTAL    | ATAXIA |
| DESPIERTO | YES       | ELEVADA        | PIE      | TRANQUILO | NO     |
| DESPIERTO | YES       | BAJA           | PIE      | DORMIDO   | NO     |
| DESPIERTO | YES       | BAJA           | ESTERNAL | TRANQUILO | NO     |
| DESPIERTO | YES       | ELEVADA        | ESTERNAL | TRANQUILO | NO     |
| DESPIERTO | YES       | ELEVADA        | PIE      | TRANQUILO | NO     |
| DESPIERTO | YES       | ELEVADA        | PIE      | TRANQUILO | NO     |
| DESPIERTO | YES       | ELEVADA        | SENTADO  | NERVIOSO  | NO     |
| DESPIERTO | YES       | ELEVADA        | PIE      | TRANQUILO | NO     |
| DESPIERTO | YES       | ELEVADA        | ESTERNAL | NERVIOSO  | NO     |
| DESPIERTO | YES       | ELEVADA        | PIE      | MIEDOSO   | NO     |
| DESPIERTO | YES       | ELEVADA        | PIE      | TRANQUILO | NO     |
| DESPIERTO | YES       | ELEVADA        | PIE      | NERVIOSO  | NO     |
| DESPIERTO | YES       | BAJA           | PIE      | TRANQUILO | NO     |
| DESPIERTO | YES       | ELEVADA        | PIE      | TRANQUILO | NO     |
| DESPIERTO | YES       | ELEVADA        | PIE      | NERVIOSO  | NO     |
| DESPIERTO | YES       | ELEVADA        | ESTERNAL | TRANQUILO | YES    |
| DESPIERTO | YES       | ELEVADA        | PIE      | TRANQUILO | NO     |
| DESPIERTO | YES       | ELEVADA        | PIE      | TRANQUILO | NO     |
| DESPIERTO | YES       | ELEVADA        | PIE      | TRANQUILO | NO     |
| DESPIERTO | YES       | ELEVADA        | ESTERNAL | TRANQUILO | NO     |
| DESPIERTO | YES       | ELEVADA        | PIE      | TRANQUILO | NO     |
| DESPIERTO | YES       | ELEVADA        | SENTADO  | TRANQUILO | NO     |
| DESPIERTO | YES       | ELEVADA        | SENTADO  | NERVIOSO  | NO     |
| DESPIERTO | YES       | ELEVADA        | PIE      | TRANQUILO | NO     |
| DESPIERTO | YES       | ELEVADA        | PIE      | TRANQUILO | NO     |
| DESPIERTO | YES       | ELEVADA        | PIE      | NERVIOSO  | NO     |
| DESPIERTO | YES       | ELEVADA        | SENTADO  | NERVIOSO  | NO     |
| DESPIERTO | YES       | ELEVADA        | PIE      | NERVIOSO  | NO     |
| DESPIERTO | YES       | ELEVADA        | SENTADO  | TRANQUILO | NO     |
| DESPIERTO | YES       | ELEVADA        | ESTERNAL | NERVIOSO  | NO     |
| DESPIERTO | YES       | ELEVADA        | PIE      | TRANQUILO | NO     |
| DESPIERTO | YES       | ELEVADA        | PIE      | NERVIOSO  | NO     |
| DESPIERTO | YES       | ELEVADA        | PIE      | MIEDOSO   | NO     |
| DESPIERTO | YES       | ELEVADA        | PIE      | NERVIOSO  | NO     |
| DESPIERTO | YES       | ELEVADA        | PIE      | TRANQUILO | NO     |
| DESPIERTO | YES       | ELEVADA        | PIE      | NERVIOSO  | NO     |
| DESPIERTO | YES       | ELEVADA        | PIE      | NERVIOSO  | NO     |
| DESPIERTO | YES       | ELEVADA        | SENTADO  | NERVIOSO  | NO     |
| DESPIERTO | YES       | ELEVADA        | PIE      | NERVIOSO  | NO     |
| DESPIERTO | YES       | ELEVADA        | PIE      | NERVIOSO  | NO     |
| DESPIERTO | YES       | ELEVADA        | SENTADO  | NERVIOSO  | NO     |
| DESPIERTO | YES       | ELEVADA        | PIE      | MIEDOSO   | NO     |
| DESPIERTO | YES       | ELEVADA        | PIE      | NERVIOSO  | NO     |
| DESPIERTO | YES       | ELEVADA        | PIE      | NERVIOSO  | NO     |
| DESPIERTO | YES       | ELEVADA        | PIE      | NERVIOSO  | NO     |
| DESPIERTO | YES       | ELEVADA        | PIE      | TRANQUILO | NO     |
| DESPIERTO | YES       | ELEVADA        | PIE      | NERVIOSO  | NO     |
| DESPIERTO | YES       | ELEVADA        | PIE      | MIEDOSO   | NO     |
| DESPIERTO | YES       | ELEVADA        | PIE      | MIEDOSO   | NO     |



DATOS

|          |     |         |          |             |     |
|----------|-----|---------|----------|-------------|-----|
| LIGERA   | YES | ELEVADA | ESTERNAL | SOMNOLIENTO | NO  |
| LIGERA   | NO  | BAJA    | SENTADO  | SOMNOLIENTO | NO  |
| LIGERA   | YES | BAJA    | ESTERNAL | TRANQUILO   | YES |
| LIGERA   | NO  | BAJA    | ESTERNAL | TRANQUILO   | NO  |
| LIGERA   | YES | ELEVADA | SENTADO  | TRANQUILO   | YES |
| LIGERA   | YES | ELEVADA | PIE      | TRANQUILO   | NO  |
| LIGERA   | YES | BAJA    | ESTERNAL | SOMNOLIENTO | YES |
| LIGERA   | YES | ELEVADA | PIE      | TRANQUILO   | YES |
| LIGERA   | YES | BAJA    | ESTERNAL | SOMNOLIENTO | YES |
| LIGERA   | NO  | BAJA    | LATERAL  | TRANQUILO   | NO  |
| LIGERA   | YES | BAJA    | SENTADO  | TRANQUILO   | NO  |
| LIGERA   | YES | BAJA    | PIE      | TRANQUILO   | NO  |
| LIGERA   | YES | BAJA    | PIE      | TRANQUILO   | NO  |
| LIGERA   | YES | BAJA    | PIE      | TRANQUILO   | NO  |
| MODERADA | YES | SUELO   | ESTERNAL | SOMNOLIENTO | NO  |
| MODERADA | NO  | BAJA    | ESTERNAL | DORMIDO     | NO  |
| MODERADA | NO  | BAJA    | ESTERNAL | DORMIDO     | NO  |
| MODERADA | NO  | SUELO   | ESTERNAL | SOMNOLIENTO | YES |
| MODERADA | YES | BAJA    | ESTERNAL | TRANQUILO   | NO  |
| MODERADA | NO  | SUELO   | ESTERNAL | TRANQUILO   | NO  |
| MODERADA | YES | BAJA    | ESTERNAL | SOMNOLIENTO | YES |
| MODERADA | NO  | BAJA    | ESTERNAL | SOMNOLIENTO | NO  |
| MODERADA | YES | ELEVADA | ESTERNAL | SOMNOLIENTO | NO  |
| MODERADA | NO  | SUELO   | LATERAL  | SOMNOLIENTO | YES |
| MODERADA | NO  | SUELO   | ESTERNAL | DORMIDO     | NO  |
| MODERADA | YES | BAJA    | ESTERNAL | SOMNOLIENTO | NO  |
| MODERADA | NO  | SUELO   | ESTERNAL | SOMNOLIENTO | NO  |
| MODERADA | NO  | SUELO   | ESTERNAL | TRANQUILO   | YES |
| MODERADA | YES | SUELO   | ESTERNAL | SOMNOLIENTO | YES |
| MODERADA | YES | SUELO   | ESTERNAL | SOMNOLIENTO | YES |
| MODERADA | NO  | SUELO   | LATERAL  | TRANQUILO   | NO  |
| MODERADA | NO  | SUELO   | LATERAL  | DORMIDO     | YES |
| MODERADA | NO  | BAJA    | ESTERNAL | SOMNOLIENTO | YES |
| MODERADA | YES | ELEVADA | ESTERNAL | TRANQUILO   | YES |
| MODERADA | NO  | BAJA    | ESTERNAL | TRANQUILO   | NO  |
| MODERADA | NO  | BAJA    | ESTERNAL | SOMNOLIENTO | NO  |
| MODERADA | YES | BAJA    | ESTERNAL | SOMNOLIENTO | NO  |
| MODERADA | YES | BAJA    | ESTERNAL | TRANQUILO   | NO  |
| MODERADA | NO  | SUELO   | LATERAL  | SOMNOLIENTO | YES |
| MODERADA | NO  | SUELO   | ESTERNAL | TRANQUILO   | NO  |
| MODERADA | YES | BAJA    | ESTERNAL | TRANQUILO   | NO  |
| MODERADA | YES | SUELO   | LATERAL  | TRANQUILO   | NO  |
| MODERADA | NO  | SUELO   | ESTERNAL | TRANQUILO   | YES |
| MODERADA | NO  | SUELO   | ESTERNAL | TRANQUILO   | YES |
| MODERADA | NO  | BAJA    | ESTERNAL | SOMNOLIENTO | NO  |
| MODERADA | NO  | BAJA    | ESTERNAL | TRANQUILO   | YES |
| MODERADA | YES | SUELO   | ESTERNAL | SOMNOLIENTO | NO  |
| MODERADA | YES | SUELO   | ESTERNAL | SOMNOLIENTO | YES |
| MODERADA | NO  | BAJA    | ESTERNAL | TRANQUILO   | YES |
| MODERADA | YES | SUELO   | ESTERNAL | TRANQUILO   | NO  |
| PROFUNDA | NO  | SUELO   | ESTERNAL | DORMIDO     | NO  |
| PROFUNDA | NO  | ELEVADA | LATERAL  | DORMIDO     | YES |
| PROFUNDA | NO  | SUELO   | ESTERNAL | SOMNOLIENTO | YES |

DATOS

|          |     |         |          |             |     |
|----------|-----|---------|----------|-------------|-----|
| PROFUNDA | NO  | SUELO   | LATERAL  | DORMIDO     | NO  |
| PROFUNDA | YES | SUELO   | ESTERNAL | DORMIDO     | YES |
| PROFUNDA | NO  | BAJA    | ESTERNAL | SOMNOLIENTO | YES |
| PROFUNDA | NO  | SUELO   | LATERAL  | SOMNOLIENTO | NO  |
| PROFUNDA | NO  | SUELO   | LATERAL  | TRANQUILO   | NO  |
| PROFUNDA | NO  | BAJA    | ESTERNAL | SOMNOLIENTO | YES |
| PROFUNDA | NO  | SUELO   | LATERAL  | DORMIDO     | YES |
| PROFUNDA | NO  | SUELO   | LATERAL  | SOMNOLIENTO | YES |
| PROFUNDA | NO  | SUELO   | ESTERNAL | DORMIDO     | NO  |
| PROFUNDA | NO  | SUELO   | ESTERNAL | SOMNOLIENTO | NO  |
| PROFUNDA | YES | SUELO   | LATERAL  | DORMIDO     | YES |
| PROFUNDA | NO  | SUELO   | ESTERNAL | SOMNOLIENTO | YES |
| PROFUNDA | NO  | SUELO   | LATERAL  | SOMNOLIENTO | NO  |
| PROFUNDA | YES | SUELO   | LATERAL  | DORMIDO     | NO  |
| PROFUNDA | NO  | SUELO   | LATERAL  | DORMIDO     | NO  |
| PROFUNDA | YES | BAJA    | ESTERNAL | TRANQUILO   | NO  |
| PROFUNDA | NO  | SUELO   | ESTERNAL | DORMIDO     | YES |
| PROFUNDA | NO  | SUELO   | LATERAL  | DORMIDO     | YES |
| PROFUNDA | YES | BAJA    | LATERAL  | TRANQUILO   | NO  |
| PROFUNDA | NO  | SUELO   | LATERAL  | DORMIDO     | NO  |
| PROFUNDA | NO  | SUELO   | LATERAL  | TRANQUILO   | YES |
| PROFUNDA | NO  | SUELO   | ESTERNAL | SOMNOLIENTO | NO  |
| PROFUNDA | YES | BAJA    | LATERAL  | TRANQUILO   | YES |
| PROFUNDA | NO  | SUELO   | LATERAL  | SOMNOLIENTO | NO  |
| PROFUNDA | NO  | BAJA    | LATERAL  | DORMIDO     | NO  |
| PROFUNDA | NO  | SUELO   | ESTERNAL | SOMNOLIENTO | YES |
| PROFUNDA | YES | SUELO   | LATERAL  | SOMNOLIENTO | YES |
| PROFUNDA | NO  | SUELO   | ESTERNAL | SOMNOLIENTO | YES |
| MODERADA | YES | ELEVADA | SENTADO  | TRANQUILO   | NO  |
| PROFUNDA | NO  | SUELO   | LATERAL  | DORMIDO     | YES |
| PROFUNDA | NO  | BAJA    | LATERAL  | DORMIDO     | NO  |
| PROFUNDA | NO  | SUELO   | LATERAL  | DORMIDO     | YES |
| PROFUNDA | NO  | SUELO   | ESTERNAL | DORMIDO     | NO  |
| PROFUNDA | YES | SUELO   | LATERAL  | DORMIDO     | NO  |
| PROFUNDA | NO  | SUELO   | LATERAL  | SOMNOLIENTO | NO  |
| PROFUNDA | NO  | SUELO   | ESTERNAL | NERVIOSO    | YES |
| PROFUNDA | YES | SUELO   | ESTERNAL | TRANQUILO   | YES |
| PROFUNDA | NO  | SUELO   | LATERAL  | SOMNOLIENTO | YES |
| PROFUNDA | NO  | SUELO   | LATERAL  | SOMNOLIENTO | YES |
| PROFUNDA | NO  | SUELO   | LATERAL  | DORMIDO     | NO  |
| PROFUNDA | NO  | SUELO   | LATERAL  | SOMNOLIENTO | YES |
| PROFUNDA | NO  | SUELO   | LATERAL  | DORMIDO     | NO  |
| PROFUNDA | NO  | SUELO   | LATERAL  | SOMNOLIENTO | NO  |
| PROFUNDA | NO  | SUELO   | ESTERNAL | SOMNOLIENTO | YES |
| PROFUNDA | YES | SUELO   | ESTERNAL | SOMNOLIENTO | YES |
| PROFUNDA | NO  | SUELO   | LATERAL  | SOMNOLIENTO | NO  |
| PROFUNDA | YES | SUELO   | ESTERNAL | SOMNOLIENTO | YES |
| PROFUNDA | NO  | SUELO   | LATERAL  | SOMNOLIENTO | YES |

DATOS

| Hyperactive | Hypermetria | Follows with eyes | Follows with the | Muscle Tone |
|-------------|-------------|-------------------|------------------|-------------|
| HIPERACTIVO | MOVEXAGE    | SIGUEMIRADA       | MIRACABEZA       | TONO        |
| NO          | NO          | YES               | YES              | NORMAL      |
| NO          | NO          | NO                | NO               | NORMAL      |
| NO          | NO          | NO                | NO               | NORMAL      |
| NO          | NO          | YES               | YES              | NORMAL      |
| NO          | NO          | YES               | YES              | NORMAL      |
| NO          | NO          | YES               | YES              | NORMAL      |
| NO          | NO          | YES               | YES              | NORMAL      |
| NO          | NO          | YES               | YES              | NORMAL      |
| NO          | NO          | YES               | YES              | NORMAL      |
| NO          | NO          | NO                | NO               | TENSO       |
| NO          | NO          | YES               | YES              | NORMAL      |
| NO          | NO          | YES               | YES              | NORMAL      |
| NO          | NO          | YES               | YES              | TENSO       |
| NO          | NO          | NO                | NO               | NORMAL      |
| NO          | NO          | NO                | NO               | NORMAL      |
| NO          | NO          | NO                | NO               | NORMAL      |
| NO          | NO          | YES               | YES              | NORMAL      |
| NO          | NO          | YES               | YES              | NORMAL      |
| NO          | NO          | YES               | YES              | NORMAL      |
| NO          | NO          | YES               | YES              | NORMAL      |
| NO          | NO          | YES               | YES              | NORMAL      |
| NO          | NO          | YES               | YES              | NORMAL      |
| NO          | NO          | YES               | YES              | NORMAL      |
| NO          | NO          | YES               | YES              | NORMAL      |
| NO          | NO          | NO                | NO               | NORMAL      |
| NO          | NO          | YES               | YES              | NORMAL      |
| NO          | NO          | YES               | YES              | NORMAL      |
| NO          | NO          | YES               | YES              | TENSO       |
| NO          | NO          | NO                | NO               | NORMAL      |
| NO          | NO          | YES               | YES              | NORMAL      |
| NO          | YES         | YES               | YES              | NORMAL      |
| NO          | NO          | YES               | YES              | NORMAL      |
| YES         | NO          | YES               | YES              | NORMAL      |
| NO          | NO          | NO                | NO               | TENSO       |
| NO          | NO          | YES               | YES              | NORMAL      |
| NO          | NO          | YES               | NO               | NORMAL      |
| NO          | NO          | YES               | YES              | NORMAL      |
| NO          | NO          | YES               | YES              | NORMAL      |
| YES         | YES         | YES               | NO               | NORMAL      |
| NO          | NO          | YES               | YES              | NORMAL      |
| YES         | NO          | YES               | YES              | NORMAL      |
| NO          | NO          | YES               | YES              | NORMAL      |
| NO          | NO          | YES               | YES              | NORMAL      |
| NO          | NO          | YES               | YES              | NORMAL      |
| NO          | NO          | YES               | YES              | TENSO       |
| NO          | NO          | NO                | NO               | TENSO       |
| NO          | NO          | YES               | YES              | TENSO       |
| NO          | NO          | NO                | NO               | NORMAL      |
| NO          | NO          | YES               | YES              | NORMAL      |
| YES         | NO          | YES               | YES              | TENSO       |
| NO          | NO          | YES               | YES              | NORMAL      |
| NO          | NO          | NO                | YES              | NORMAL      |

DATOS

|     |     |     |     |          |
|-----|-----|-----|-----|----------|
| NO  | NO  | YES | YES | NORMAL   |
| NO  | NO  | YES | YES | TENSO    |
| NO  | NO  | YES | YES | NORMAL   |
| NO  | NO  | YES | YES | TENSO    |
| NO  | NO  | NO  | NO  | NORMAL   |
| NO  | NO  | YES | YES | NORMAL   |
| YES | NO  | YES | NO  | TENSO    |
| NO  | NO  | YES | YES | TENSO    |
| YES | NO  | YES | YES | NORMAL   |
| NO  | NO  | YES | YES | NORMAL   |
| NO  | NO  | NO  | NO  | NORMAL   |
| NO  | NO  | YES | YES | NORMAL   |
| NO  | NO  | YES | YES | NORMAL   |
| NO  | NO  | YES | YES | NORMAL   |
| NO  | NO  | YES | YES | NORMAL   |
| NO  | NO  | YES | YES | NORMAL   |
| NO  | NO  | YES | YES | NORMAL   |
| NO  | NO  | YES | YES | NORMAL   |
| YES | NO  | YES | YES | TENSO    |
| NO  | NO  | NO  | NO  | TENSO    |
| NO  | NO  | YES | YES | NORMAL   |
| NO  | NO  | YES | YES | NORMAL   |
| NO  | NO  | YES | YES | NORMAL   |
| NO  | NO  | YES | YES | NORMAL   |
| NO  | NO  | NO  | NO  | NORMAL   |
| NO  | NO  | YES | YES | NORMAL   |
| YES | NO  | YES | YES | NORMAL   |
| NO  | NO  | NO  | YES | NORMAL   |
| NO  | NO  | YES | YES | NORMAL   |
| NO  | NO  | YES | YES | NORMAL   |
| NO  | NO  | YES | YES | NORMAL   |
| NO  | NO  | YES | YES | NORMAL   |
| YES | NO  | NO  | NO  | NORMAL   |
| NO  | NO  | YES | YES | NORMAL   |
| NO  | NO  | YES | YES | TENSO    |
| YES | NO  | YES | YES | NORMAL   |
| NO  | NO  | YES | YES | TENSO    |
| NO  | NO  | YES | YES | TENSO    |
| YES | YES | YES | YES | NORMAL   |
| NO  | YES | YES | YES | TENSO    |
| NO  | NO  | YES | YES | NORMAL   |
| NO  | NO  | YES | YES | RELAJADO |
| NO  | NO  | YES | YES | NORMAL   |
| YES | YES | YES | YES | NORMAL   |
| NO  | NO  | YES | NO  | RELAJADO |
| NO  | NO  | YES | NO  | RELAJADO |
| NO  | NO  | YES | YES | NORMAL   |
| NO  | NO  | YES | NO  | RELAJADO |
| NO  | NO  | YES | YES | NORMAL   |
| NO  | NO  | YES | YES | NORMAL   |
| NO  | NO  | NO  | NO  | RELAJADO |
| NO  | NO  | NO  | NO  | NORMAL   |

DATOS

|    |    |     |     |          |
|----|----|-----|-----|----------|
| NO | NO | YES | YES | RELAJADO |
| NO | NO | YES | NO  | NORMAL   |
| NO | NO | YES | NO  | RELAJADO |
| NO | NO | YES | NO  | RELAJADO |
| NO | NO | YES | YES | RELAJADO |
| NO | NO | YES | YES | NORMAL   |
| NO | NO | YES | NO  | RELAJADO |
| NO | NO | YES | YES | NORMAL   |
| NO | NO | YES | NO  | NORMAL   |
| NO | NO | NO  | YES | RELAJADO |
| NO | NO | NO  | YES | TENSO    |
| NO | NO | NO  | NO  | RELAJADO |
| NO | NO | NO  | NO  | RELAJADO |
| NO | NO | NO  | NO  | RELAJADO |
| NO | NO | NO  | NO  | RELAJADO |
| NO | NO | NO  | NO  | RELAJADO |
| NO | NO | NO  | NO  | RELAJADO |
| NO | NO | NO  | YES | RELAJADO |
| NO | NO | NO  | NO  | RELAJADO |
| NO | NO | YES | YES | NORMAL   |
| NO | NO | NO  | NO  | RELAJADO |
| NO | NO | NO  | NO  | RELAJADO |
| NO | NO | YES | YES | NORMAL   |
| NO | NO | NO  | NO  | RELAJADO |
| NO | NO | YES | NO  | RELAJADO |
| NO | NO | YES | NO  | NORMAL   |
| NO | NO | YES | YES | NORMAL   |
| NO | NO | NO  | NO  | RELAJADO |
| NO | NO | NO  | NO  | RELAJADO |
| NO | NO | NO  | NO  | RELAJADO |
| NO | NO | YES | YES | RELAJADO |
| NO | NO | YES | NO  | RELAJADO |
| NO | NO | YES | YES | RELAJADO |
| NO | NO | NO  | NO  | RELAJADO |
| NO | NO | YES | YES | NORMAL   |
| NO | NO | NO  | NO  | RELAJADO |
| NO | NO | YES | NO  | RELAJADO |
| NO | NO | YES | YES | NORMAL   |
| NO | NO | YES | NO  | RELAJADO |
| NO | NO | YES | NO  | RELAJADO |
| NO | NO | NO  | NO  | RELAJADO |
| NO | NO | YES | NO  | RELAJADO |
| NO | NO | YES | YES | RELAJADO |
| NO | NO | NO  | NO  | RELAJADO |
| NO | NO | YES | NO  | NORMAL   |
| NO | NO | YES | NO  | NORMAL   |
| NO | NO | YES | NO  | RELAJADO |
| NO | NO | NO  | NO  | RELAJADO |
| NO | NO | NO  | NO  | RELAJADO |
| NO | NO | NO  | NO  | RELAJADO |







DATOS

|     |             |     |     |     |
|-----|-------------|-----|-----|-----|
| YES | NORMALES    | SIN | NO  | YES |
| YES | NORMALES    | SIN | NO  | YES |
| YES | NORMALES    | SIN | NO  | NO  |
| YES | AUMENTADOS  | SIN | NO  | NO  |
| YES | NORMALES    | SIN | NO  | NO  |
| YES | NORMALES    | SIN | NO  | NO  |
| YES | AUMENTADOS  | SIN | NO  | YES |
| YES | AUMENTADOS  | SIN | NO  | NO  |
| YES | AUMENTADOS  | SIN | NO  | YES |
| YES | NORMALES    | SIN | NO  | NO  |
| YES | NORMALES    | SIN | NO  | NO  |
| YES | NORMALES    | SIN | NO  | NO  |
| YES | NORMALES    | SIN | NO  | NO  |
| YES | NORMALES    | SIN | NO  | NO  |
| YES | NORMALES    | SIN | NO  | YES |
| YES | NORMALES    | SIN | NO  | NO  |
| YES | NORMALES    | SIN | NO  | YES |
| YES | NORMALES    | SIN | NO  | YES |
| YES | NORMALES    | SIN | NO  | YES |
| YES | AUMENTADOS  | SIN | NO  | NO  |
| YES | NORMALES    | SIN | NO  | NO  |
| YES | NORMALES    | SIN | NO  | NO  |
| YES | NORMALES    | SIN | NO  | NO  |
| YES | NORMALES    | SIN | NO  | YES |
| YES | NORMALES    | SIN | NO  | NO  |
| YES | NORMALES    | SIN | NO  | NO  |
| YES | NORMALES    | SIN | NO  | YES |
| YES | NORMALES    | SIN | NO  | NO  |
| YES | NORMALES    | SIN | NO  | NO  |
| YES | NORMALES    | SIN | NO  | NO  |
| YES | NORMALES    | SIN | NO  | YES |
| YES | NORMALES    | SIN | YES | YES |
| YES | NORMALES    | SIN | NO  | YES |
| YES | NORMALES    | SIN | NO  | NO  |
| YES | NORMALES    | SIN | NO  | NO  |
| YES | NORMALES    | SIN | NO  | NO  |
| YES | NORMALES    | SIN | NO  | NO  |
| YES | AUMENTADOS  | SIN | NO  | YES |
| YES | NORMALES    | SIN | NO  | YES |
| YES | AUMENTADOS  | SIN | NO  | YES |
| YES | AUMENTADOS  | SIN | NO  | NO  |
| YES | NORMALES    | CON | NO  | NO  |
| YES | DISMINUIDOS | CON | NO  | NO  |
| YES | NORMALES    | SIN | NO  | NO  |
| YES | AUMENTADOS  | CON | NO  | NO  |
| YES | DISMINUIDOS | CON | NO  | NO  |
| YES | DISMINUIDOS | CON | NO  | NO  |
| YES | NORMALES    | SIN | NO  | NO  |
| YES | DISMINUIDOS | SIN | NO  | NO  |
| YES | DISMINUIDOS | CON | NO  | YES |
| YES | DISMINUIDOS | CON | NO  | NO  |
| YES | DISMINUIDOS | CON | NO  | YES |
| YES | NORMALES    | SIN | NO  | NO  |

DATOS

|     |             |          |     |     |
|-----|-------------|----------|-----|-----|
| YES | DISMINUIDOS | CON      | NO  | NO  |
| NO  | DISMINUIDOS | CON      | NO  | NO  |
| YES | DISMINUIDOS | CON      | NO  | NO  |
| YES | DISMINUIDOS | CON      | NO  | NO  |
| YES | NORMALES    | CON      | NO  | NO  |
| YES | NORMALES    | SIN      | NO  | YES |
| YES | DISMINUIDOS | CON      | NO  | NO  |
| YES | DISMINUIDOS | CON      | NO  | YES |
| YES | DISMINUIDOS | CON      | NO  | NO  |
| YES | AUMENTADOS  | CON      | NO  | NO  |
| YES | DISMINUIDOS | CON      | NO  | NO  |
| YES | NORMALES    | NOCAMBIA | NO  | NO  |
| YES | NORMALES    | NOCAMBIA | NO  | NO  |
| YES | NORMALES    | NOCAMBIA | NO  | NO  |
| YES | DISMINUIDOS | CON      | NO  | NO  |
| NO  | DISMINUIDOS | CON      | NO  | NO  |
| NO  | DISMINUIDOS | CON      | NO  | NO  |
| NO  | DISMINUIDOS | CON      | NO  | NO  |
| NO  | DISMINUIDOS | NOCAMBIA | NO  | NO  |
| YES | DISMINUIDOS | NOCAMBIA | NO  | NO  |
| YES | DISMINUIDOS | CON      | NO  | NO  |
| NO  | DISMINUIDOS | NOCAMBIA | NO  | NO  |
| YES | DISMINUIDOS | CON      | NO  | NO  |
| YES | NORMALES    | CON      | NO  | NO  |
| NO  | DISMINUIDOS | CON      | NO  | YES |
| YES | NORMALES    | CON      | NO  | NO  |
| YES | DISMINUIDOS | NOCAMBIA | NO  | NO  |
| NO  | DISMINUIDOS | NOCAMBIA | NO  | NO  |
| YES | NORMALES    | CON      | NO  | NO  |
| YES | DISMINUIDOS | CON      | NO  | NO  |
| NO  | DISMINUIDOS | CON      | NO  | NO  |
| NO  | DISMINUIDOS | CON      | NO  | NO  |
| YES | DISMINUIDOS | CON      | NO  | NO  |
| YES | DISMINUIDOS | CON      | NO  | NO  |
| YES | DISMINUIDOS | CON      | NO  | YES |
| YES | DISMINUIDOS | CON      | NO  | NO  |
| YES | DISMINUIDOS | NOCAMBIA | NO  | NO  |
| YES | NORMALES    | NOCAMBIA | YES | NO  |
| YES | DISMINUIDOS | CON      | NO  | NO  |
| YES | DISMINUIDOS | CON      | NO  | YES |
| YES | DISMINUIDOS | CON      | NO  | NO  |
| YES | DISMINUIDOS | CON      | NO  | NO  |
| YES | DISMINUIDOS | CON      | NO  | NO  |
| YES | DISMINUIDOS | CON      | NO  | NO  |
| YES | DISMINUIDOS | CON      | NO  | NO  |
| YES | DISMINUIDOS | CON      | NO  | NO  |
| YES | DISMINUIDOS | CON      | NO  | YES |
| YES | DISMINUIDOS | CON      | NO  | NO  |
| YES | DISMINUIDOS | CON      | NO  | NO  |
| YES | DISMINUIDOS | CON      | NO  | NO  |
| YES | DISMINUIDOS | CON      | NO  | NO  |
| NO  | DISMINUIDOS | NOCAMBIA | NO  | NO  |
| NO  | AUSENTES    | NOCAMBIA | NO  | NO  |
| NO  | AUSENTES    | NOCAMBIA | NO  | NO  |

DATOS

|     |             |          |    |     |
|-----|-------------|----------|----|-----|
| NO  | AUSENTES    | NOCAMBIA | NO | NO  |
| YES | DISMINUIDOS | NOCAMBIA | NO | NO  |
| NO  | DISMINUIDOS | NOCAMBIA | NO | NO  |
| YES | AUSENTES    | NOCAMBIA | NO | NO  |
| NO  | DISMINUIDOS | NOCAMBIA | NO | NO  |
| NO  | DISMINUIDOS | NOCAMBIA | NO | NO  |
| YES | AUSENTES    | NOCAMBIA | NO | NO  |
| YES | DISMINUIDOS | CON      | NO | NO  |
| YES | DISMINUIDOS | CON      | NO | NO  |
| NO  | DISMINUIDOS | NOCAMBIA | NO | NO  |
| NO  | DISMINUIDOS | NOCAMBIA | NO | NO  |
| NO  | AUSENTES    | NOCAMBIA | NO | NO  |
| NO  | AUSENTES    | NOCAMBIA | NO | NO  |
| NO  | AUSENTES    | NOCAMBIA | NO | NO  |
| NO  | AUSENTES    | NOCAMBIA | NO | NO  |
| NO  | DISMINUIDOS | NOCAMBIA | NO | NO  |
| YES | AUSENTES    | NOCAMBIA | NO | NO  |
| NO  | AUSENTES    | NOCAMBIA | NO | NO  |
| NO  | AUSENTES    | NOCAMBIA | NO | NO  |
| NO  | AUSENTES    | NOCAMBIA | NO | NO  |
| NO  | AUSENTES    | CON      | NO | NO  |
| YES | DISMINUIDOS | NOCAMBIA | NO | NO  |
| YES | DISMINUIDOS | NOCAMBIA | NO | YES |
| NO  | AUSENTES    | NOCAMBIA | NO | NO  |
| NO  | DISMINUIDOS | NOCAMBIA | NO | NO  |
| YES | DISMINUIDOS | CON      | NO | NO  |
| NO  | DISMINUIDOS | NOCAMBIA | NO | NO  |
| NO  | DISMINUIDOS | NOCAMBIA | NO | YES |
| YES | DISMINUIDOS | CON      | NO | NO  |
| NO  | AUSENTES    | NOCAMBIA | NO | NO  |
| NO  | DISMINUIDOS | NOCAMBIA | NO | NO  |
| YES | AUSENTES    | NOCAMBIA | NO | NO  |
| NO  | AUSENTES    | NOCAMBIA | NO | NO  |
| NO  | AUSENTES    | NOCAMBIA | NO | NO  |
| NO  | AUSENTES    | NOCAMBIA | NO | NO  |
| YES | AUSENTES    | NOCAMBIA | NO | NO  |
| NO  | DISMINUIDOS | NOCAMBIA | NO | NO  |
| NO  | DISMINUIDOS | CON      | NO | NO  |
| NO  | AUSENTES    | CON      | NO | NO  |
| NO  | AUSENTES    | NOCAMBIA | NO | NO  |
| NO  | AUSENTES    | NOCAMBIA | NO | NO  |
| YES | DISMINUIDOS | CON      | NO | NO  |
| NO  | AUSENTES    | NOCAMBIA | NO | NO  |
| YES | DISMINUIDOS | CON      | NO | NO  |
| YES | AUMENTADOS  | CON      | NO | NO  |
| NO  | AUSENTES    | NOCAMBIA | NO | NO  |
| NO  | DISMINUIDOS | CON      | NO | NO  |
| NO  | DISMINUIDOS | CON      | NO | NO  |



DATOS

|    |     |     |     |     |
|----|-----|-----|-----|-----|
| NO | NO  | NO  | YES | YES |
| NO | NO  | NO  | YES | YES |
| NO | NO  | NO  | YES | YES |
| NO | NO  | NO  | YES | YES |
| NO | NO  | NO  | NO  | YES |
| NO | NO  | NO  | YES | YES |
| NO | NO  | NO  | NO  | YES |
| NO | NO  | NO  | YES | YES |
| NO | NO  | YES | YES | YES |
| NO | NO  | NO  | NO  | YES |
| NO | NO  | NO  | NO  | YES |
| NO | NO  | NO  | NO  | YES |
| NO | NO  | NO  | YES | YES |
| NO | NO  | YES | NO  | YES |
| NO | NO  | NO  | NO  | YES |
| NO | NO  | NO  | YES | YES |
| NO | NO  | NO  | NO  | YES |
| NO | NO  | NO  | NO  | YES |
| NO | NO  | NO  | YES | YES |
| NO | NO  | YES | NO  | YES |
| NO | YES | NO  | NO  | YES |
| NO | NO  | NO  | YES | YES |
| NO | NO  | NO  | YES | YES |
| NO | NO  | NO  | NO  | YES |
| NO | NO  | NO  | NO  | YES |
| NO | NO  | NO  | NO  | YES |
| NO | YES | NO  | NO  | YES |
| NO | NO  | NO  | YES | YES |
| NO | NO  | YES | YES | YES |
| NO | NO  | NO  | YES | YES |
| NO | NO  | NO  | NO  | NO  |
| NO | NO  | NO  | YES | YES |
| NO | YES | NO  | NO  | YES |
| NO | NO  | NO  | NO  | NO  |
| NO | NO  | NO  | NO  | NO  |
| NO | NO  | YES | NO  | YES |
| NO | YES | YES | NO  | YES |
| NO | YES | YES | NO  | NO  |
| NO | NO  | NO  | YES | NO  |
| NO | NO  | NO  | NO  | NO  |
| NO | YES | NO  | NO  | YES |











DATOS

|     |     |     |    |     |     |
|-----|-----|-----|----|-----|-----|
| YES | NO  | NO  | NO | NO  | NO  |
| YES | NO  | NO  | NO | NO  | NO  |
| NO  | NO  | NO  | NO | NO  | NO  |
| NO  | NO  | YES | NO | NO  | YES |
| YES | NO  | NO  | NO | NO  | NO  |
| NO  | NO  | NO  | NO | NO  | NO  |
| YES | NO  | NO  | NO | NO  | NO  |
| NO  | NO  | NO  | NO | NO  | NO  |
| YES | YES | NO  | NO | NO  | YES |
| YES | NO  | NO  | NO | NO  | NO  |
| YES | NO  | NO  | NO | NO  | NO  |
| NO  | NO  | NO  | NO | YES | YES |
| NO  | NO  | NO  | NO | YES | YES |
| NO  | NO  | NO  | NO | YES | YES |
| NO  | NO  | NO  | NO | NO  | NO  |
| YES | NO  | NO  | NO | NO  | YES |
| NO  | NO  | NO  | NO | YES | NO  |
| NO  | NO  | YES | NO | YES | NO  |
| NO  | NO  | NO  | NO | YES | NO  |
| YES | NO  | NO  | NO | YES | YES |
| NO  | YES | NO  | NO | NO  | NO  |
| YES | NO  | NO  | NO | YES | YES |
| YES | NO  | NO  | NO | NO  | NO  |
| YES | NO  | NO  | NO | YES | NO  |
| YES | NO  | NO  | NO | NO  | NO  |
| YES | NO  | NO  | NO | NO  | NO  |
| YES | NO  | NO  | NO | NO  | NO  |
| YES | YES | NO  | NO | NO  | YES |
| NO  | YES | NO  | NO | NO  | NO  |
| YES | NO  | NO  | NO | NO  | NO  |
| YES | NO  | NO  | NO | NO  | NO  |
| YES | NO  | NO  | NO | NO  | NO  |
| YES | NO  | NO  | NO | NO  | NO  |
| YES | NO  | NO  | NO | NO  | NO  |
| YES | NO  | NO  | NO | NO  | NO  |
| YES | NO  | NO  | NO | NO  | NO  |
| YES | NO  | NO  | NO | NO  | NO  |
| YES | NO  | NO  | NO | NO  | NO  |
| YES | NO  | NO  | NO | NO  | NO  |
| YES | NO  | NO  | NO | NO  | NO  |
| YES | NO  | NO  | NO | NO  | NO  |
| YES | NO  | NO  | NO | NO  | NO  |
| NO  | NO  | NO  | NO | YES | NO  |
| NO  | NO  | YES | NO | NO  | NO  |
| NO  | NO  | YES | NO | YES | YES |













DATOS

| Respiratoy rate | Panting | Menace Response | Hold limb       | Pinching toe |
|-----------------|---------|-----------------|-----------------|--------------|
| FR              | JADEO   | AMENAZA         | COGEREXTREMIDAD | PULPEJO      |
| NORMAL          | NO      | NORMAL          | YES             | NORMAL       |
| DISMINUIDA      | NO      | DISMINUIDO      | YES             | NORMAL       |
| DISMINUIDA      | NO      | DISMINUIDO      | YES             | NORMAL       |
| NORMAL          | NO      | NORMAL          | YES             | NORMAL       |
| NORMAL          | NO      | NORMAL          | YES             | NORMAL       |
| NORMAL          | NO      | NORMAL          | YES             | NORMAL       |
| NORMAL          | NO      | NORMAL          | YES             | NORMAL       |
| NORMAL          | NO      | NORMAL          | YES             | NORMAL       |
| AUMENTADA       | NO      | NORMAL          | YES             | NORMAL       |
| AUMENTADA       | NO      | DISMINUIDO      | YES             | NORMAL       |
| NORMAL          | NO      | NORMAL          | YES             | NORMAL       |
| AUMENTADA       | YES     | NORMAL          | YES             | NORMAL       |
| NORMAL          | NO      | NORMAL          | YES             | NORMAL       |
| NORMAL          | NO      | NORMAL          | YES             | NORMAL       |
| NORMAL          | NO      | NORMAL          | NO              | NORMAL       |
| NORMAL          | NO      | DISMINUIDO      | YES             | NORMAL       |
| NORMAL          | NO      | NORMAL          | NO              | NORMAL       |
| NORMAL          | NO      | NORMAL          | YES             | NORMAL       |
| NORMAL          | NO      | NULO            | YES             | NORMAL       |
| NORMAL          | NO      | NORMAL          | YES             | NORMAL       |
| NORMAL          | NO      | NORMAL          | YES             | NORMAL       |
| NORMAL          | NO      | NORMAL          | YES             | NORMAL       |
| NORMAL          | NO      | NORMAL          | YES             | NORMAL       |
| AUMENTADA       | NO      | NORMAL          | YES             | NORMAL       |
| NORMAL          | NO      | NORMAL          | YES             | NORMAL       |
| NORMAL          | NO      | NORMAL          | YES             | NORMAL       |
| AUMENTADA       | YES     | NORMAL          | YES             | NORMAL       |
| NORMAL          | NO      | NORMAL          | YES             | NORMAL       |
| NORMAL          | NO      | NORMAL          | YES             | NORMAL       |
| NORMAL          | NO      | NORMAL          | YES             | NORMAL       |
| AUMENTADA       | NO      | NORMAL          | YES             | NORMAL       |
| NORMAL          | NO      | NORMAL          | YES             | NORMAL       |
| AUMENTADA       | YES     | NORMAL          | NO              | AUMENTADO    |
| AUMENTADA       | YES     | AUMENTADO       | NO              | AUMENTADO    |
| NORMAL          | NO      | NORMAL          | YES             | NORMAL       |
| NORMAL          | NO      | NORMAL          | YES             | NORMAL       |
| NORMAL          | NO      | NORMAL          | NO              | NORMAL       |
| NORMAL          | YES     | NORMAL          | YES             | NORMAL       |
| AUMENTADA       | NO      | NORMAL          | YES             | NORMAL       |
| NORMAL          | NO      | NORMAL          | NO              | NORMAL       |
| DISMINUIDA      | YES     | NORMAL          | YES             | NORMAL       |
| NORMAL          | NO      | NORMAL          | YES             | NORMAL       |
| AUMENTADA       | YES     | NORMAL          | YES             | NORMAL       |
| NORMAL          | NO      | NORMAL          | YES             | NORMAL       |
| AUMENTADA       | YES     | NORMAL          | YES             | NORMAL       |
| AUMENTADA       | YES     | NORMAL          | YES             | NORMAL       |
| AUMENTADA       | NO      | NORMAL          | NO              | AUMENTADO    |
| NORMAL          | NO      | NORMAL          | NO              | NORMAL       |
| AUMENTADA       | NO      | NORMAL          | YES             | NORMAL       |
| AUMENTADA       | NO      | NORMAL          | YES             | NORMAL       |
| NORMAL          | NO      | NORMAL          | YES             | NORMAL       |
| AUMENTADA       | YES     | NORMAL          | NO              | NORMAL       |

DATOS

|            |     |            |     |            |
|------------|-----|------------|-----|------------|
| NORMAL     | NO  | NORMAL     | YES | NORMAL     |
| AUMENTADA  | YES | NORMAL     | YES | NORMAL     |
| NORMAL     | NO  | NORMAL     | YES | NORMAL     |
| NORMAL     | NO  | NORMAL     | NO  | NORMAL     |
| AUMENTADA  | YES | NORMAL     | YES | NORMAL     |
| NORMAL     | NO  | NORMAL     | YES | NORMAL     |
| AUMENTADA  | YES | NORMAL     | YES | NORMAL     |
| AUMENTADA  | NO  | NORMAL     | YES | AUMENTADO  |
| AUMENTADA  | YES | NORMAL     | YES | AUMENTADO  |
| NORMAL     | NO  | NORMAL     | YES | NORMAL     |
| NORMAL     | NO  | NORMAL     | YES | NORMAL     |
| NORMAL     | NO  | NORMAL     | YES | NORMAL     |
| NORMAL     | NO  | NORMAL     | YES | NORMAL     |
| NORMAL     | NO  | NORMAL     | YES | NORMAL     |
| AUMENTADA  | YES | NORMAL     | YES | NORMAL     |
| NORMAL     | NO  | NORMAL     | YES | NORMAL     |
| NORMAL     | NO  | NORMAL     | NO  | NORMAL     |
| NORMAL     | NO  | NORMAL     | NO  | NORMAL     |
| NORMAL     | YES | NORMAL     | NO  | NORMAL     |
| AUMENTADA  | NO  | NORMAL     | NO  | NORMAL     |
| NORMAL     | NO  | NORMAL     | YES | NORMAL     |
| NORMAL     | NO  | NORMAL     | YES | NORMAL     |
| AUMENTADA  | NO  | NORMAL     | YES | NORMAL     |
| AUMENTADA  | YES | NORMAL     | YES | NORMAL     |
| NORMAL     | NO  | NORMAL     | YES | NORMAL     |
| NORMAL     | NO  | NORMAL     | YES | NORMAL     |
| AUMENTADA  | NO  | NORMAL     | YES | NORMAL     |
| AUMENTADA  | NO  | NORMAL     | YES | AUMENTADO  |
| AUMENTADA  | NO  | NORMAL     | YES | NORMAL     |
| NORMAL     | NO  | DISMINUIDO | YES | NORMAL     |
| NORMAL     | NO  | NORMAL     | YES | NORMAL     |
| NORMAL     | NO  | NORMAL     | YES | NORMAL     |
| AUMENTADA  | YES | NORMAL     | YES | NORMAL     |
| AUMENTADA  | YES | NORMAL     | NO  | NORMAL     |
| AUMENTADA  | YES | NORMAL     | YES | NORMAL     |
| NORMAL     | NO  | NORMAL     | YES | NORMAL     |
| AUMENTADA  | NO  | NORMAL     | YES | NORMAL     |
| AUMENTADA  | NO  | NORMAL     | NO  | NORMAL     |
| AUMENTADA  | NO  | AUMENTADO  | YES | AUMENTADO  |
| AUMENTADA  | NO  | NORMAL     | YES | DISMINUIDO |
| AUMENTADA  | NO  | NORMAL     | NO  | NORMAL     |
| AUMENTADA  | NO  | NORMAL     | NO  | NORMAL     |
| AUMENTADA  | YES | NORMAL     | YES | DISMINUIDO |
| DISMINUIDA | NO  | DISMINUIDO | YES | DISMINUIDO |
| NORMAL     | NO  | NORMAL     | YES | NORMAL     |
| NORMAL     | NO  | NORMAL     | YES | NORMAL     |
| AUMENTADA  | NO  | NORMAL     | YES | NORMAL     |
| AUMENTADA  | YES | DISMINUIDO | YES | DISMINUIDO |
| NORMAL     | NO  | NORMAL     | YES | NORMAL     |
| AUMENTADA  | YES | NORMAL     | YES | NORMAL     |
| NORMAL     | NO  | NORMAL     | YES | NORMAL     |
| AUMENTADA  | YES | NORMAL     | YES | NORMAL     |
| DISMINUIDA | NO  | DISMINUIDO | YES | DISMINUIDO |
| AUMENTADA  | YES | NORMAL     | YES | NORMAL     |

DATOS

|            |     |            |     |            |
|------------|-----|------------|-----|------------|
| AUMENTADA  | YES | NORMAL     | YES | NORMAL     |
| NORMAL     | NO  | NORMAL     | YES | NORMAL     |
| AUMENTADA  | NO  | DISMINUIDO | YES | NORMAL     |
| DISMINUIDA | NO  | DISMINUIDO | YES | DISMINUIDO |
| NORMAL     | NO  | NORMAL     | YES | NORMAL     |
| AUMENTADA  | NO  | NORMAL     | YES | NORMAL     |
| AUMENTADA  | YES | NORMAL     | YES | NORMAL     |
| NORMAL     | NO  | NORMAL     | YES | DISMINUIDO |
| AUMENTADA  | NO  | DISMINUIDO | YES | DISMINUIDO |
| DISMINUIDA | NO  | NORMAL     | YES | NORMAL     |
| DISMINUIDA | NO  | NORMAL     | NO  | NORMAL     |
| NORMAL     | NO  | DISMINUIDO | YES | NORMAL     |
| NORMAL     | NO  | NULO       | YES | DISMINUIDO |
| DISMINUIDA | NO  | DISMINUIDO | YES | DISMINUIDO |
| NORMAL     | NO  | NORMAL     | YES | NORMAL     |
| DISMINUIDA | NO  | DISMINUIDO | YES | DISMINUIDO |
| DISMINUIDA | NO  | NULO       | YES | DISMINUIDO |
| NORMAL     | NO  | NULO       | YES | NORMAL     |
| DISMINUIDA | NO  | DISMINUIDO | YES | DISMINUIDO |
| DISMINUIDA | NO  | DISMINUIDO | YES | DISMINUIDO |
| NORMAL     | NO  | DISMINUIDO | YES | NULO       |
| DISMINUIDA | NO  | DISMINUIDO | YES | DISMINUIDO |
| NORMAL     | NO  | NORMAL     | YES | DISMINUIDO |
| DISMINUIDA | NO  | NULO       | YES | DISMINUIDO |
| AUMENTADA  | YES | DISMINUIDO | YES | NORMAL     |
| NORMAL     | NO  | NORMAL     | YES | NORMAL     |
| DISMINUIDA | NO  | DISMINUIDO | YES | NULO       |
| DISMINUIDA | NO  | DISMINUIDO | YES | DISMINUIDO |
| AUMENTADA  | YES | NORMAL     | YES | NULO       |
| AUMENTADA  | NO  | NORMAL     | YES | NULO       |
| DISMINUIDA | NO  | NULO       | YES | DISMINUIDO |
| NORMAL     | YES | DISMINUIDO | YES | DISMINUIDO |
| DISMINUIDA | YES | DISMINUIDO | YES | DISMINUIDO |
| NORMAL     | NO  | DISMINUIDO | YES | DISMINUIDO |
| DISMINUIDA | NO  | NORMAL     | YES | NORMAL     |
| AUMENTADA  | YES | DISMINUIDO | YES | DISMINUIDO |
| NORMAL     | NO  | DISMINUIDO | YES | DISMINUIDO |
| NORMAL     | NO  | NORMAL     | YES | DISMINUIDO |
| DISMINUIDA | NO  | DISMINUIDO | YES | DISMINUIDO |
| DISMINUIDA | NO  | DISMINUIDO | YES | DISMINUIDO |
| NORMAL     | NO  | NORMAL     | YES | DISMINUIDO |
| DISMINUIDA | NO  | DISMINUIDO | YES | DISMINUIDO |
| NORMAL     | NO  | DISMINUIDO | YES | DISMINUIDO |
| NORMAL     | NO  | DISMINUIDO | YES | DISMINUIDO |
| DISMINUIDA | YES | DISMINUIDO | YES | DISMINUIDO |
| NORMAL     | NO  | DISMINUIDO | YES | NULO       |
| DISMINUIDA | NO  | NULO       | YES | DISMINUIDO |
| AUMENTADA  | YES | NORMAL     | YES | NORMAL     |
| NORMAL     | NO  | NORMAL     | YES | DISMINUIDO |
| NORMAL     | NO  | DISMINUIDO | YES | NORMAL     |
| NORMAL     | NO  | NULO       | YES | NULO       |
| DISMINUIDA | NO  | DISMINUIDO | YES | NULO       |
| NORMAL     | NO  | NULO       | YES | NULO       |

DATOS

|            |    |            |     |            |
|------------|----|------------|-----|------------|
| DISMINUIDA | NO | NULO       | YES | NULO       |
| AUMENTADA  | NO | DISMINUIDO | YES | DISMINUIDO |
| NORMAL     | NO | NULO       | NO  | NORMAL     |
| DISMINUIDA | NO | NORMAL     | YES | NORMAL     |
| DISMINUIDA | NO | DISMINUIDO | YES | DISMINUIDO |
| DISMINUIDA | NO | NULO       | YES | DISMINUIDO |
| DISMINUIDA | NO | NULO       | YES | NORMAL     |
| DISMINUIDA | NO | NULO       | YES | DISMINUIDO |
| NORMAL     | NO | DISMINUIDO | YES | NULO       |
| DISMINUIDA | NO | DISMINUIDO | YES | DISMINUIDO |
| DISMINUIDA | NO | DISMINUIDO | YES | DISMINUIDO |
| DISMINUIDA | NO | NULO       | YES | DISMINUIDO |
| DISMINUIDA | NO | NULO       | NO  | DISMINUIDO |
| DISMINUIDA | NO | NORMAL     | NO  | DISMINUIDO |
| DISMINUIDA | NO | DISMINUIDO | YES | NULO       |
| DISMINUIDA | NO | NORMAL     | YES | NULO       |
| DISMINUIDA | NO | NULO       | YES | NULO       |
| DISMINUIDA | NO | NULO       | YES | NORMAL     |
| NORMAL     | NO | NORMAL     | YES | NORMAL     |
| DISMINUIDA | NO | NULO       | NO  | DISMINUIDO |
| AUMENTADA  | NO | DISMINUIDO | YES | NULO       |
| DISMINUIDA | NO | DISMINUIDO | YES | NULO       |
| DISMINUIDA | NO | NULO       | YES | NULO       |
| DISMINUIDA | NO | NULO       | YES | NULO       |
| DISMINUIDA | NO | DISMINUIDO | YES | DISMINUIDO |
| DISMINUIDA | NO | NULO       | YES | DISMINUIDO |
| NORMAL     | NO | NULO       | YES | NORMAL     |
| DISMINUIDA | NO | DISMINUIDO | YES | DISMINUIDO |
| NORMAL     | NO | DISMINUIDO | YES | NORMAL     |
| DISMINUIDA | NO | NULO       | YES | NORMAL     |
| DISMINUIDA | NO | NORMAL     | YES | DISMINUIDO |
| DISMINUIDA | NO | NULO       | YES | NORMAL     |
| DISMINUIDA | NO | NULO       | YES | NULO       |
| DISMINUIDA | NO | NULO       | YES | NULO       |
| DISMINUIDA | NO | NORMAL     | YES | DISMINUIDO |
| DISMINUIDA | NO | NULO       | YES | DISMINUIDO |
| NORMAL     | NO | NORMAL     | YES | NULO       |
| NORMAL     | NO | NULO       | YES | NULO       |
| NORMAL     | NO | NULO       | YES | NULO       |
| DISMINUIDA | NO | NULO       | YES | DISMINUIDO |
| DISMINUIDA | NO | NORMAL     | YES | DISMINUIDO |
| DISMINUIDA | NO | NULO       | YES | DISMINUIDO |
| DISMINUIDA | NO | NULO       | YES | NULO       |
| DISMINUIDA | NO | NULO       | YES | NULO       |
| DISMINUIDA | NO | NORMAL     | YES | DISMINUIDO |
| DISMINUIDA | NO | NULO       | YES | DISMINUIDO |
| DISMINUIDA | NO | NORMAL     | YES | NULO       |
| DISMINUIDA | NO | NULO       | YES | NULO       |

DATOS

| Response to vc Clapping | Restrain   | Muzzle      | Procedure           |
|-------------------------|------------|-------------|---------------------|
| LLAMADA                 | PALMADA    | SUJECION    | BOZAL PROCEDIMIENTO |
| NORMAL                  | NORMAL     | SINSUJECION | NO FACILMENTE       |
| NORMAL                  | NORMAL     | SINSUJECION | NO IMPOSIBLE        |
| NORMAL                  | DISMINUIDO | SINSUJECION | NO FACILMENTE       |
| NORMAL                  | NORMAL     | SINSUJECION | NO NO               |
| NORMAL                  | NORMAL     | POSIBLE     | NO FACILMENTE       |
| NORMAL                  | NORMAL     | POSIBLE     | NO FACILMENTE       |
| NORMAL                  | NORMAL     | POSIBLE     | NO FACILMENTE       |
| NORMAL                  | NORMAL     | POSIBLE     | NO IMPOSIBLE        |
| NORMAL                  | NORMAL     | POSIBLE     | YES FACILMENTE      |
| NORMAL                  | NORMAL     | POSIBLE     | NO IMPOSIBLE        |
| NORMAL                  | NORMAL     | POSIBLE     | NO IMPOSIBLE        |
| NORMAL                  | NORMAL     | POSIBLE     | NO IMPOSIBLE        |
| NORMAL                  | NORMAL     | POSIBLE     | NO IMPOSIBLE        |
| NORMAL                  | NORMAL     | POSIBLE     | NO IMPOSIBLE        |
| NORMAL                  | NORMAL     | POSIBLE     | YES IMPOSIBLE       |
| NORMAL                  | NORMAL     | POSIBLE     | NO FACILMENTE       |
| NORMAL                  | NORMAL     | POSIBLE     | NO FACILMENTE       |
| NORMAL                  | NORMAL     | POSIBLE     | NO FACILMENTE       |
| NORMAL                  | DISMINUIDO | POSIBLE     | NO DIFICIL          |
| NORMAL                  | NORMAL     | POSIBLE     | NO FACILMENTE       |
| NORMAL                  | NORMAL     | POSIBLE     | NO FACILMENTE       |
| NORMAL                  | NORMAL     | POSIBLE     | NO FACILMENTE       |
| NORMAL                  | NORMAL     | POSIBLE     | NO IMPOSIBLE        |
| NORMAL                  | NORMAL     | POSIBLE     | NO IMPOSIBLE        |
| NORMAL                  | NORMAL     | POSIBLE     | NO FACILMENTE       |
| NORMAL                  | NORMAL     | POSIBLE     | NO FACILMENTE       |
| NORMAL                  | NORMAL     | POSIBLE     | NO IMPOSIBLE        |
| NORMAL                  | NORMAL     | POSIBLE     | NO FACILMENTE       |
| NORMAL                  | NORMAL     | POSIBLE     | NO IMPOSIBLE        |
| NORMAL                  | NORMAL     | POSIBLE     | NO FACILMENTE       |
| NORMAL                  | AUMENTADO  | BRUTA       | YES DIFICIL         |
| NORMAL                  | AUMENTADO  | BRUTA       | NO IMPOSIBLE        |
| NORMAL                  | NORMAL     | FIRME       | NO IMPOSIBLE        |
| NORMAL                  | NORMAL     | FIRME       | YES DIFICIL         |
| NORMAL                  | NORMAL     | FIRME       | NO IMPOSIBLE        |
| NORMAL                  | NORMAL     | FIRME       | NO IMPOSIBLE        |
| NORMAL                  | NORMAL     | FIRME       | YES DIFICIL         |
| NORMAL                  | NORMAL     | FIRME       | YES IMPOSIBLE       |
| NORMAL                  | NORMAL     | FIRME       | NO IMPOSIBLE        |
| NORMAL                  | NORMAL     | FIRME       | NO FACILMENTE       |
| NORMAL                  | NORMAL     | FIRME       | NO IMPOSIBLE        |
| NORMAL                  | NORMAL     | FIRME       | NO FACILMENTE       |
| NORMAL                  | NORMAL     | FIRME       | NO IMPOSIBLE        |
| NORMAL                  | NORMAL     | FIRME       | NO IMPOSIBLE        |
| NORMAL                  | NORMAL     | FIRME       | NO DIFICIL          |
| NORMAL                  | NORMAL     | FIRME       | YES FACILMENTE      |
| NORMAL                  | NORMAL     | FIRME       | NO IMPOSIBLE        |
| NORMAL                  | NORMAL     | FIRME       | NO IMPOSIBLE        |
| NORMAL                  | NORMAL     | FIRME       | NO FACILMENTE       |
| NORMAL                  | NORMAL     | FIRME       | NO IMPOSIBLE        |

DATOS

|            |            |             |     |            |
|------------|------------|-------------|-----|------------|
| NORMAL     | NORMAL     | FIRME       | NO  | IMPOSIBLE  |
| NORMAL     | AUMENTADO  | FIRME       | NO  | FACILMENTE |
| NORMAL     | NORMAL     | FIRME       | NO  | FACILMENTE |
| NORMAL     | NORMAL     | FIRME       | NO  | IMPOSIBLE  |
| NORMAL     | NORMAL     | FIRME       | NO  | FACILMENTE |
| NORMAL     | NORMAL     | FIRME       | NO  | FACILMENTE |
| NORMAL     | NORMAL     | FIRME       | YES | IMPOSIBLE  |
| NORMAL     | NORMAL     | FIRME       | NO  | IMPOSIBLE  |
| NORMAL     | NORMAL     | FIRME       | NO  | FACILMENTE |
| NORMAL     | NORMAL     | FIRME       | NO  | FACILMENTE |
| NORMAL     | NORMAL     | FIRME       | NO  | IMPOSIBLE  |
| NORMAL     | NORMAL     | FIRME       | NO  | IMPOSIBLE  |
| NORMAL     | NORMAL     | FIRME       | NO  | IMPOSIBLE  |
| NORMAL     | NORMAL     | FIRME       | NO  | IMPOSIBLE  |
| NORMAL     | NORMAL     | FIRME       | NO  | DIFICIL    |
| NORMAL     | NORMAL     | FIRME       | NO  | FACILMENTE |
| NORMAL     | NORMAL     | FIRME       | YES | IMPOSIBLE  |
| NORMAL     | NORMAL     | FIRME       | NO  | IMPOSIBLE  |
| NORMAL     | NORMAL     | FIRME       | NO  | IMPOSIBLE  |
| NORMAL     | NORMAL     | FIRME       | NO  | IMPOSIBLE  |
| NORMAL     | NORMAL     | FIRME       | NO  | IMPOSIBLE  |
| NORMAL     | NORMAL     | FIRME       | NO  | IMPOSIBLE  |
| NORMAL     | NORMAL     | FIRME       | NO  | IMPOSIBLE  |
| NORMAL     | NORMAL     | FIRME       | NO  | FACILMENTE |
| NORMAL     | NORMAL     | FIRME       | YES | IMPOSIBLE  |
| NORMAL     | NORMAL     | FIRME       | NO  | IMPOSIBLE  |
| NORMAL     | NORMAL     | FIRME       | NO  | IMPOSIBLE  |
| NORMAL     | NORMAL     | FIRME       | NO  | IMPOSIBLE  |
| NORMAL     | NORMAL     | FIRME       | YES | IMPOSIBLE  |
| NORMAL     | NORMAL     | FIRME       | NO  | IMPOSIBLE  |
| NORMAL     | NORMAL     | FIRME       | NO  | DIFICIL    |
| NORMAL     | NORMAL     | FIRME       | NO  | IMPOSIBLE  |
| NORMAL     | NORMAL     | FIRME       | NO  | FACILMENTE |
| NORMAL     | NORMAL     | BRUTA       | NO  | IMPOSIBLE  |
| NORMAL     | NORMAL     | BRUTA       | YES | IMPOSIBLE  |
| NORMAL     | NORMAL     | BRUTA       | YES | IMPOSIBLE  |
| NORMAL     | NORMAL     | BRUTA       | YES | IMPOSIBLE  |
| NORMAL     | NORMAL     | BRUTA       | NO  | IMPOSIBLE  |
| NORMAL     | NORMAL     | BRUTA       | YES | FACILMENTE |
| AUMENTADO  | AUMENTADO  | BRUTA       | NO  | IMPOSIBLE  |
| NORMAL     | AUMENTADO  | BRUTA       | YES | IMPOSIBLE  |
| NORMAL     | NORMAL     | BRUTA       | NO  | IMPOSIBLE  |
| AUMENTADO  | NORMAL     | BRUTA       | YES | IMPOSIBLE  |
| NORMAL     | NORMAL     | SINSUJECION | NO  | FACILMENTE |
| NORMAL     | DISMINUIDO | SINSUJECION | NO  | FACILMENTE |
| NORMAL     | NORMAL     | SINSUJECION | NO  | FACILMENTE |
| NORMAL     | NORMAL     | POSIBLE     | NO  | DIFICIL    |
| NORMAL     | NORMAL     | POSIBLE     | NO  | FACILMENTE |
| DISMINUIDO | DISMINUIDO | POSIBLE     | NO  | FACILMENTE |
| NORMAL     | NORMAL     | POSIBLE     | NO  | IMPOSIBLE  |
| DISMINUIDO | NORMAL     | POSIBLE     | NO  | FACILMENTE |
| NORMAL     | NORMAL     | POSIBLE     | NO  | FACILMENTE |
| NORMAL     | NORMAL     | POSIBLE     | NO  | FACILMENTE |
| NORMAL     | NORMAL     | POSIBLE     | NO  | FACILMENTE |
| NORMAL     | DISMINUIDO | POSIBLE     | YES | DIFICIL    |
| NORMAL     | NORMAL     | POSIBLE     | NO  | FACILMENTE |

DATOS

|            |            |             |     |            |
|------------|------------|-------------|-----|------------|
| NORMAL     | NORMAL     | POSIBLE     | NO  | IMPOSIBLE  |
| NORMAL     | DISMINUIDO | POSIBLE     | NO  | FACILMENTE |
| NORMAL     | NORMAL     | POSIBLE     | NO  | IMPOSIBLE  |
| DISMINUIDO | DISMINUIDO | POSIBLE     | YES | DIFICIL    |
| DISMINUIDO | NORMAL     | POSIBLE     | NO  | FACILMENTE |
| NORMAL     | NORMAL     | POSIBLE     | YES | DIFICIL    |
| NORMAL     | DISMINUIDO | POSIBLE     | NO  | FACILMENTE |
| DISMINUIDO | DISMINUIDO | POSIBLE     | NO  | FACILMENTE |
| DISMINUIDO | NORMAL     | POSIBLE     | NO  | DIFICIL    |
| NORMAL     | NORMAL     | POSIBLE     | NO  | FACILMENTE |
| DISMINUIDO | NORMAL     | POSIBLE     | NO  | FACILMENTE |
| DISMINUIDO | DISMINUIDO | SINSUJECION | NO  | FACILMENTE |
| DISMINUIDO | DISMINUIDO | SINSUJECION | NO  | FACILMENTE |
| DISMINUIDO | DISMINUIDO | SINSUJECION | NO  | FACILMENTE |
| NORMAL     | NORMAL     | SINSUJECION | NO  | FACILMENTE |
| DISMINUIDO | DISMINUIDO | SINSUJECION | NO  | FACILMENTE |
| DISMINUIDO | DISMINUIDO | SINSUJECION | NO  | FACILMENTE |
| DISMINUIDO | NULO       | SINSUJECION | NO  | FACILMENTE |
| DISMINUIDO | DISMINUIDO | SINSUJECION | NO  | FACILMENTE |
| DISMINUIDO | DISMINUIDO | SINSUJECION | NO  | FACILMENTE |
| NULO       | NULO       | SINSUJECION | NO  | FACILMENTE |
| DISMINUIDO | DISMINUIDO | SINSUJECION | NO  | FACILMENTE |
| DISMINUIDO | NORMAL     | SINSUJECION | NO  | FACILMENTE |
| NULO       | NULO       | SINSUJECION | NO  | DIFICIL    |
| DISMINUIDO | DISMINUIDO | SINSUJECION | YES | FACILMENTE |
| DISMINUIDO | DISMINUIDO | SINSUJECION | NO  | FACILMENTE |
| NORMAL     | DISMINUIDO | SINSUJECION | NO  | FACILMENTE |
| NULO       | DISMINUIDO | SINSUJECION | NO  | FACILMENTE |
| DISMINUIDO | DISMINUIDO | SINSUJECION | NO  | FACILMENTE |
| DISMINUIDO | DISMINUIDO | SINSUJECION | NO  | FACILMENTE |
| DISMINUIDO | DISMINUIDO | SINSUJECION | NO  | FACILMENTE |
| DISMINUIDO | DISMINUIDO | POSIBLE     | NO  | FACILMENTE |
| DISMINUIDO | DISMINUIDO | POSIBLE     | NO  | FACILMENTE |
| DISMINUIDO | NORMAL     | POSIBLE     | NO  | FACILMENTE |
| DISMINUIDO | DISMINUIDO | POSIBLE     | NO  | FACILMENTE |
| DISMINUIDO | NULO       | POSIBLE     | NO  | FACILMENTE |
| DISMINUIDO | DISMINUIDO | POSIBLE     | NO  | FACILMENTE |
| NORMAL     | NORMAL     | POSIBLE     | YES | DIFICIL    |
| DISMINUIDO | DISMINUIDO | POSIBLE     | NO  | FACILMENTE |
| DISMINUIDO | DISMINUIDO | POSIBLE     | NO  | FACILMENTE |
| DISMINUIDO | NORMAL     | POSIBLE     | NO  | FACILMENTE |
| DISMINUIDO | DISMINUIDO | POSIBLE     | NO  | FACILMENTE |
| DISMINUIDO | NORMAL     | POSIBLE     | NO  | FACILMENTE |
| NULO       | DISMINUIDO | POSIBLE     | NO  | FACILMENTE |
| DISMINUIDO | DISMINUIDO | POSIBLE     | NO  | FACILMENTE |
| DISMINUIDO | DISMINUIDO | POSIBLE     | NO  | FACILMENTE |
| NORMAL     | NORMAL     | POSIBLE     | NO  | FACILMENTE |
| NULO       | DISMINUIDO | POSIBLE     | NO  | FACILMENTE |
| DISMINUIDO | NULO       | POSIBLE     | NO  | DIFICIL    |
| DISMINUIDO | DISMINUIDO | POSIBLE     | NO  | IMPOSIBLE  |
| NULO       | DISMINUIDO | SINSUJECION | NO  | FACILMENTE |
| DISMINUIDO | DISMINUIDO | SINSUJECION | NO  | FACILMENTE |
| NULO       | NORMAL     | SINSUJECION | NO  | FACILMENTE |

DATOS

|            |            |             |    |            |
|------------|------------|-------------|----|------------|
| NULO       | NULO       | SINSUJECION | NO | FACILMENTE |
| NULO       | DISMINUIDO | SINSUJECION | NO | FACILMENTE |
| NULO       | NULO       | SINSUJECION | NO | FACILMENTE |
| NULO       | DISMINUIDO | SINSUJECION | NO | FACILMENTE |
| NULO       | NULO       | SINSUJECION | NO | DIFICIL    |
| NULO       | NULO       | SINSUJECION | NO | FACILMENTE |
| DISMINUIDO | DISMINUIDO | SINSUJECION | NO | FACILMENTE |
| DISMINUIDO | NORMAL     | SINSUJECION | NO | FACILMENTE |
| DISMINUIDO | DISMINUIDO | SINSUJECION | NO | FACILMENTE |
| DISMINUIDO | DISMINUIDO | SINSUJECION | NO | FACILMENTE |
| DISMINUIDO | DISMINUIDO | SINSUJECION | NO | FACILMENTE |
| NULO       | NULO       | SINSUJECION | NO | FACILMENTE |
| DISMINUIDO | DISMINUIDO | SINSUJECION | NO | FACILMENTE |
| DISMINUIDO | NULO       | SINSUJECION | NO | FACILMENTE |
| DISMINUIDO | NULO       | SINSUJECION | NO | FACILMENTE |
| DISMINUIDO | NULO       | SINSUJECION | NO | FACILMENTE |
| NULO       | DISMINUIDO | SINSUJECION | NO | FACILMENTE |
| NULO       | NULO       | SINSUJECION | NO | FACILMENTE |
| NULO       | NULO       | SINSUJECION | NO | FACILMENTE |
| NULO       | NULO       | SINSUJECION | NO | FACILMENTE |
| NULO       | NULO       | SINSUJECION | NO | FACILMENTE |
| NULO       | NULO       | SINSUJECION | NO | FACILMENTE |
| NULO       | DISMINUIDO | SINSUJECION | NO | FACILMENTE |
| NULO       | NORMAL     | SINSUJECION | NO | FACILMENTE |
| NULO       | DISMINUIDO | SINSUJECION | NO | FACILMENTE |
| DISMINUIDO | NORMAL     | SINSUJECION | NO | IMPOSIBLE  |
| NORMAL     | NORMAL     | SINSUJECION | NO | FACILMENTE |
| NULO       | DISMINUIDO | SINSUJECION | NO | FACILMENTE |
| NULO       | NULO       | SINSUJECION | NO | FACILMENTE |
| NULO       | NULO       | SINSUJECION | NO | FACILMENTE |
| NULO       | NULO       | SINSUJECION | NO | FACILMENTE |
| NULO       | DISMINUIDO | SINSUJECION | NO | FACILMENTE |
| NORMAL     | NORMAL     | SINSUJECION | NO | FACILMENTE |
| NULO       | NULO       | SINSUJECION | NO | FACILMENTE |
| NULO       | NULO       | SINSUJECION | NO | FACILMENTE |
| NULO       | NULO       | SINSUJECION | NO | FACILMENTE |
| DISMINUIDO | DISMINUIDO | SINSUJECION | NO | FACILMENTE |
| DISMINUIDO | DISMINUIDO | SINSUJECION | NO | FACILMENTE |
| NULO       | NULO       | SINSUJECION | NO | FACILMENTE |
| NULO       | NULO       | SINSUJECION | NO | FACILMENTE |
| DISMINUIDO | DISMINUIDO | SINSUJECION | NO | FACILMENTE |
| NULO       | DISMINUIDO | SINSUJECION | NO | FACILMENTE |
| DISMINUIDO | DISMINUIDO | SINSUJECION | NO | FACILMENTE |
| NULO       | NULO       | SINSUJECION | NO | FACILMENTE |
| NULO       | NULO       | SINSUJECION | NO | IMPOSIBLE  |
| NULO       | DISMINUIDO | SINSUJECION | NO | NO         |
| NULO       | NULO       | POSIBLE     | NO | FACILMENTE |
| DISMINUIDO | DISMINUIDO | POSIBLE     | NO | FACILMENTE |
| NULO       | DISMINUIDO | POSIBLE     | NO | FACILMENTE |
