# Supplementary material for: The SIESTA (SEAAV Integrated evaluation sedation tool for anaesthesia) project: Initial development of a multifactorial sedation assessment tool for dogs
Source: PLoS One. 2020 Apr 1;15(4):e0230799. doi: 10.1371/journal.pone.0230799 (PMC7112187; doi:10.1371/journal.pone.0230799)
Supplement: S1 Appendix — Final version of the questionnaire distributed to the collaborators. (PDF) [file pone.0230799.s001.pdf]

|                           |                                                                                                                                 |       |                             |                   |             |           |     |                                                                                |                                                                                    |    |    |  |
|---------------------------|---------------------------------------------------------------------------------------------------------------------------------|-------|-----------------------------|-------------------|-------------|-----------|-----|--------------------------------------------------------------------------------|------------------------------------------------------------------------------------|----|----|--|
| FECHA                     |                                                                                                                                 |       |                             | EVALUADOR/CLÍNICA |             |           |     |                                                                                |                                                                                    |    |    |  |
| RAZA                      |                                                                                                                                 |       |                             | MOTIVO            |             |           |     |                                                                                |                                                                                    |    |    |  |
| SEXO                      | H                                                                                                                               | M     |                             | ASA               | I           | II        | III | IV                                                                             | V                                                                                  | E  |    |  |
| EDAD                      |                                                                                                                                 |       |                             | PESO              |             |           |     |                                                                                |                                                                                    |    |    |  |
| PROTOCOLO                 |                                                                                                                                 | DOSIS | VÍA                         |                   |             | PROTOCOLO |     | DOSIS                                                                          | VÍA                                                                                |    |    |  |
| DEX                       |                                                                                                                                 |       | IV                          | IM                | SC          | BUT       |     |                                                                                | IV                                                                                 | IM | SC |  |
| MED                       |                                                                                                                                 |       | IV                          | IM                | SC          | MRF       |     |                                                                                | IV                                                                                 | IM | SC |  |
| ACP                       |                                                                                                                                 |       | IV                          | IM                | SC          | MTD       |     |                                                                                | IV                                                                                 | IM | SC |  |
| MDZ                       |                                                                                                                                 |       | IV                          | IM                | SC          | PET       |     |                                                                                | IV                                                                                 | IM | SC |  |
| DZP                       |                                                                                                                                 |       | IV                          | IM                | SC          | FEN       |     |                                                                                | IV                                                                                 | IM | SC |  |
| ALX                       |                                                                                                                                 |       | IV                          | IM                | SC          | BUP       |     |                                                                                | IV                                                                                 | IM | SC |  |
| KET                       |                                                                                                                                 |       | IV                          | IM                | SC          | AINES     |     |                                                                                | IV                                                                                 | IM | SC |  |
| OTROS 1                   |                                                                                                                                 |       | IV                          | IM                | SC          | OTROS 2   |     |                                                                                | IV                                                                                 | IM | SC |  |
| ALERTA                    | Sí No                                                                                                                           |       |                             | COMPORTAMIENTO    |             |           |     | Agresivo<br>De huida<br>Autolesivo<br>Defensivo<br>Exploratorio<br>Interactivo |                                                                                    |    |    |  |
| ESTADO MENTAL             | Calmado/tranquilo<br>Somnoliento/Obnubilado<br>Inconsciente/Dormido<br>Nervioso/Agitado/Inquieto<br>Disfórico/Delira<br>Miedoso |       |                             |                   |             |           |     |                                                                                |                                                                                    |    |    |  |
| POSICIÓN CABEZA           | Elevada<br>Baja/caída<br>Apoyada en mesa/ suelo                                                                                 |       |                             | POSTURA           |             |           |     | De pie<br>Sentado<br>Eternal<br>Lateral                                        |                                                                                    |    |    |  |
| CAMBIO DE POSTURA         | Sin estímulo Con estímulo<br>No cambia                                                                                          |       |                             |                   |             |           |     |                                                                                |                                                                                    |    |    |  |
| ATAXIA                    |                                                                                                                                 |       | Sí                          | No                | MOVIMIENTOS |           |     |                                                                                | Voluntarios<br>Tras un estímulo<br>Con oposición<br>No posibles<br>Bruscos/rápidos |    |    |  |
| HIPERACTIVO/HIPERCINÉTICO |                                                                                                                                 |       | Sí                          | No                |             |           |     |                                                                                |                                                                                    |    |    |  |
| MOVS EXAGERADOS           |                                                                                                                                 |       | Sí                          | No                |             |           |     |                                                                                |                                                                                    |    |    |  |
| SIGUE CON LA MIRADA       |                                                                                                                                 |       | Sí                          | No                |             |           |     |                                                                                |                                                                                    |    |    |  |
| MIRA GIRANDO LA CABEZA    |                                                                                                                                 |       | Sí                          | No                |             |           |     |                                                                                |                                                                                    |    |    |  |
| TONO MUSCULAR             |                                                                                                                                 |       | Normal<br>Relajado<br>Tenso |                   | MOVIMIENTOS |           |     |                                                                                | Normales<br>Aumentados<br>Disminuidos<br>Ausentes/nulos                            |    |    |  |
|                           |                                                                                                                                 |       |                             |                   |             |           |     |                                                                                |                                                                                    |    |    |  |
|                           |                                                                                                                                 |       |                             |                   |             |           |     |                                                                                |                                                                                    |    |    |  |

|                                 |                                                |    |               |                                               |    |
|---------------------------------|------------------------------------------------|----|---------------|-----------------------------------------------|----|
| POSICIÓN DEL OJO                | Centrado<br>Rotado                             |    | VOCALIZACIÓN  | No<br>Ladra<br>Lloriquea<br>Se queja<br>Aúlla |    |
| PÁRPADOS                        | Abiertos<br>Cerrados<br>Excesivamente abiertos |    |               |                                               |    |
| REFLEJO PALPEBRAL               | Sí                                             | No | SIALORREA     | Sí                                            | No |
| 3 <sup>er</sup> PÁRPADO VISIBLE | Sí                                             | No | FR (resp/min) | Normal<br>Aumentada<br>Disminuida             |    |
| NISTAGMO                        | Sí                                             | No |               |                                               |    |
| MIDRIASIS                       | Sí                                             | No |               |                                               |    |
|                                 |                                                |    | JADEO         | Sí                                            | No |

|                     |                                           |                                              |                                                                                                                                                                                                                                             |    |
|---------------------|-------------------------------------------|----------------------------------------------|---------------------------------------------------------------------------------------------------------------------------------------------------------------------------------------------------------------------------------------------|----|
| REFLEJO DE AMENAZA  | Aumentado<br>Normal                       | POSIBLE COGER EXT. ANTERIOR                  | Sí                  No                                                                                                                                                                                                                      |    |
|                     | Disminuido<br>Nulo                        | RESPUESTA A PRESIONAR PULPEJO EXT. POSTERIOR | Aumentado<br>Normal<br>Disminuido<br>Nulo                                                                                                                                                                                                   |    |
| RESPUESTA A LLAMADA | Aumentada<br>Normal<br>Disminuida<br>Nula | RESPUESTA A LA SUJECIÓN                      | No es posible sujetarlo<br>Se resiste y sólo es posible con fuerza bruta<br>Se opone, posible con sujeción firme<br><br>Se deja, pero es necesario cierta sujeción para mantener la postura<br>Permanece en la postura deseada sin sujeción |    |
|                     |                                           |                                              |                                                                                                                                                                                                                                             |    |
| RESPUESTA A PALMADA | Aumentada<br>Normal<br>Disminuida<br>Nula | NECESITA BOZAL                               | Sí                                                                                                                                                                                                                                          | No |

|                                           |                             |                  |    |    |     |
|-------------------------------------------|-----------------------------|------------------|----|----|-----|
| PROCEDIMIENTO FINAL/MOTIVO DE LA SEDACIÓN | Sí, fácilmente              | CATÉTER VENOSO   | Sí | No | N/A |
|                                           | Sí, con dificultad          | CATÉTER ARTERIAL | Sí | No | N/A |
|                                           | No posible                  | CATÉTER CENTRAL  | Sí | No | N/A |
| RASURADO                                  | Sí          No          N/A | RADIOGRAFÍA      | Sí | No | N/A |
| VENOCLISIS                                | Sí          No          N/A | CAMPO QUIRÚRGICO | Sí | No | N/A |

GRADO SEDACIÓN

No sedación

Ligera

Moderada

Profunda

Excitación

OBSERVACIONES
