# Supplementary material for: The SIESTA (SEAAV Integrated evaluation sedation tool for anaesthesia) project: Initial development of a multifactorial sedation assessment tool for dogs
Source: PLoS One. 2020 Apr 1;15(4):e0230799. doi: 10.1371/journal.pone.0230799 (PMC7112187; doi:10.1371/journal.pone.0230799)
Supplement: S3 Data — (PDF) [file pone.0230799.s004.pdf]

|                                 |                                                                                                                                                                                     |
|---------------------------------|-------------------------------------------------------------------------------------------------------------------------------------------------------------------------------------|
|                                 | NO SEDACIÓN                                                                                                                                                                         |
| Estado mental                   | Alerta<br>Despierto<br>Activo<br>Consciente<br>Inquieto<br>Intranquilo<br>Nervioso<br>Pendiente del alrededor<br>Atento                                                             |
| Movimiento                      | Camina<br>Sin ataxia<br>Moverse libremente<br>Deambulaci3n normal<br>Movimientos voluntarios<br>Movimientos coordinados<br>Movimientos normales<br>Correr o trotar<br>Energ3a/vivaz |
| Postura                         | De pie<br>Estaci3n<br>Estral<br>Sentado<br>Mueve cabeza<br>Cabeza en posici3n normal<br>Cambia de postura voluntaria<br>Rehuye el decubito estral y lateral                         |
| Respuesta a est3mulos           | Reacci3n normal<br>Reactivo a est3mulos<br>Reacci3n r3pida<br>Mueve cabeza como respuesta a est3mulos<br>Respuesta a est3mulos leves                                                |
| Respuesta a est3mulos visuales  | Sigue con la mirada<br>Mira<br>Respuesta r3pida a est3mulo visual<br>Respuesta a test de amenaza                                                                                    |
| Respuesta a est3mulos auditivos | Atiende a llamada<br>Respuesta r3pida a est3mulo sonoro<br>Escucha<br>Mueve orejas con est3mulos auditivos<br>Responde a palmada                                                    |

|                                |                                                                                                                                                       |
|--------------------------------|-------------------------------------------------------------------------------------------------------------------------------------------------------|
|                                | Responde a órdenes                                                                                                                                    |
| Respuesta a estímulos táctiles | Respuesta rápida a estímulo táctiles<br>Respuesta a contacto                                                                                          |
| Respuesta a estímulo doloroso  | Responde                                                                                                                                              |
| Comportamiento                 | Investigación/olisqueando<br>Estrés<br>Interactivo                                                                                                    |
| Procedimiento                  | Reacciona al procedimiento<br>Reacción al manejo                                                                                                      |
| Respuesta a la sujeción        | Se opone o aparta<br>Lucha al sentirse inmovilizado<br>Sujeción firme<br>Bozal<br>Aparta extremidades cuando se le cojen<br>Escapa al subir a la mesa |
| Tono muscular                  | Normal<br>Tenso                                                                                                                                       |
| Reflejo deglutor               |                                                                                                                                                       |
| Parámetros fisiológicos        | HR y FR normal o elevada<br>Jadea                                                                                                                     |
| Expresión facial               | Normal                                                                                                                                                |
| Ojo                            | Abierto                                                                                                                                               |
| Pupila                         | Centrada                                                                                                                                              |
| Vocalización                   | Voluntaria<br>Intermitente                                                                                                                            |
| Salivación                     |                                                                                                                                                       |

|         |  |
|---------|--|
| Mucosas |  |
|---------|--|

| SEDACIÓN LIGERA                                                                                                                                                                                                                                                  | SEDACIÓN MODERADA                                                                                                                                                                                          |
|------------------------------------------------------------------------------------------------------------------------------------------------------------------------------------------------------------------------------------------------------------------|------------------------------------------------------------------------------------------------------------------------------------------------------------------------------------------------------------|
| Somnoliento<br>Calmado/tranquilo<br>Atontado<br>Ligera disociación del medio<br>Consciente<br>Atención disminuida<br>Se puede despertar fácilmente<br>Pendiente del alrededor<br>Atento                                                                          | Ausente<br>Sueño ligero<br>Calmado/tranquilo<br>Somnoliento<br>Deprimido<br>Obnubilado<br>Alerta reducida<br>Desconectado del medio                                                                        |
| Ataxia<br>Sin ataxia<br>Ataxia leve<br>Deambulación normal<br>Movimientos lentos<br>Movimientos voluntarios<br>Movimientos coordinados<br>Deambulación lenta<br>Mueve la cola<br>Inmóvil<br>Energía disminuida<br>Camina si lo desea<br>Camina si se le estimula | Ataxia<br>Deambula con ataxia<br>Movimientos disminuidos<br>Oposición al movimiento<br>No puede caminar<br>Camina si se le estimula<br>Cola inmóvil<br>Cambia de postura si se estimula                    |
| De pie<br>Eternal con cabeza elevada<br>Setando con cabeza baja<br>Sentado<br>Eternal<br>Cabeza baja<br>Cambia de postura si se estimula<br>Poco cambio                                                                                                          | Lateral<br>Pérdida de reflejo esternal<br>Eternal con cabeza elevada<br>Eternal con cabeza baja<br>Eternal<br>Cambia de postura si se estimula<br>Cabeza baja<br>Cabeza suelo<br>Reflejo esternal positivo |
| Respuesta a estímulos moderados<br>Reactivo a estímulos<br>Reacción lenta                                                                                                                                                                                        | Responde<br>Poco reactivo<br>Respuesta disminuida<br>Respuesta disminuida a estímulos moderados<br>Sólo responde a estímulos repetidos                                                                     |
| Sigue con la mirada más lentamente<br>Reacción lenta<br>Responde                                                                                                                                                                                                 | Sigue con la mirada sin movimiento corporal<br>No respuesta<br>Respuesta disminuida<br>Reacción lenta                                                                                                      |
| Atiende a llamada con lentitud<br>Respuesta disminuida a estímulo sonoro<br>Respuesta a palmada<br>Reacción lenta<br>Responde                                                                                                                                    | Responde<br>Respuesta disminuida a estímulo sonoro<br>Respuesta disminuida a estímulos moderados<br>Respuesta muy disminuida a llamada<br>Reacción lenta                                                   |

|                                                                                                                                                                                                           |                                                                                                                                                       |
|-----------------------------------------------------------------------------------------------------------------------------------------------------------------------------------------------------------|-------------------------------------------------------------------------------------------------------------------------------------------------------|
| Atiende a llamada                                                                                                                                                                                         |                                                                                                                                                       |
| Respuesta disminuida a estímulo táctiles<br>Reacción lenta<br>Responde                                                                                                                                    | Responde<br>Respuesta disminuida a estímulo táctiles<br>Respuesta disminuida a estímulos moderados<br>Reacción lenta                                  |
| Disminuida<br>Responde a estímulo leve<br>Imposible procedimiento doloroso intenso                                                                                                                        | Responde<br>Disminuida<br>No respuesta<br>Imposible procedimiento doloroso intenso                                                                    |
| Menos interactivo                                                                                                                                                                                         |                                                                                                                                                       |
| Permite el procedimiento con sujeción<br>Reacciona al procedimiento<br>No permite llevar a cabo procedimiento                                                                                             | No respuesta<br>Ligera respuesta<br>No respuesta a posturas incómodas                                                                                 |
| Normal<br>Se opone o aparta con lentitud<br>Permite manipulación<br>Permite sujeción prolongada<br>Permite sujetar extremidades y moverlas<br>Rehuye decúbito lateral<br>Permite ser colocado en esternal | No respuesta<br>Respuesta disminuida                                                                                                                  |
| Relajación ligera                                                                                                                                                                                         | Relajación moderada                                                                                                                                   |
|                                                                                                                                                                                                           |                                                                                                                                                       |
| Normales o disminuidas                                                                                                                                                                                    | Disminuidas                                                                                                                                           |
| Relajada                                                                                                                                                                                                  | Relajada                                                                                                                                              |
| Posición normal<br>Tercer parpado<br>Reflejo palpebral positivo<br>Abierto<br>Mueve ojos constantemente                                                                                                   | Rotado ligeramente<br>Tercer parpado<br>Reflejo palpebral positivo disminuido<br>Cerrados<br>Abierto<br>Reflejo palpebral positivo<br>Posición normal |
| Centrada                                                                                                                                                                                                  |                                                                                                                                                       |
|                                                                                                                                                                                                           |                                                                                                                                                       |
|                                                                                                                                                                                                           |                                                                                                                                                       |

|  |  |
|--|--|
|  |  |
|--|--|

| SEDACIÓN PROFUNDA                                                                                                 | EXCITACIÓN                                                                                                                                                                              |
|-------------------------------------------------------------------------------------------------------------------|-----------------------------------------------------------------------------------------------------------------------------------------------------------------------------------------|
| Sueño profundo<br>Estuporoso<br>Inconsciente<br>Desconectado del medio<br>Es posible despertarlo<br>Obnubilado    | Nervioso<br>Disfórico<br>Alerta<br>Delirando<br>Agitado<br>Miedoso                                                                                                                      |
| No puede caminar<br>Inmóvil<br>Movimientos incoordinados<br>No camina incluso estimulado<br>No puede estar de pie | Movimientos bruscos<br>Movimientos desproporcionados<br>Movimientos violentos<br>Hiperkinesia<br>Movimientos espontáneos<br>Movimientos constantes<br>Ataxia<br>Deambula<br>Hiperactivo |
| Lateral<br>Pérdida de reflejo esternal<br>Eternal con cabeza en suelo<br>Cabeza suelo                             | De pie<br>Eternal                                                                                                                                                                       |
| No respuesta<br>Respuesta disminuida<br>Sólo responde a estímulos intensos<br>Respuesta disminuida lenta          | Respuesta exagerada<br>No atiende a órdenes<br>Hiperreflexia<br>Mueve cabeza como respuesta a estímulos<br>Respuesta rápida                                                             |
| No respuesta                                                                                                      | Respuesta exagerada                                                                                                                                                                     |
| No respuesta<br>Respuesta disminuida a estímulos intensos                                                         | No atiende a órdenes<br>No responde a llamada<br>Respuesta exagerada<br>No se calma con palabras                                                                                        |

|                                                                                                            |                                                                                         |
|------------------------------------------------------------------------------------------------------------|-----------------------------------------------------------------------------------------|
|                                                                                                            |                                                                                         |
| No respuesta<br>Respuesta disminuida a estímulos intensos                                                  | Respuesta exagerada<br>No se calma con contacto físico                                  |
| Puede responder a estímulo intenso<br>No respuesta                                                         | Respuesta exagerada                                                                     |
|                                                                                                            | Agresivo<br>De huida<br>Autolesión<br>Defensivo                                         |
| No respuesta<br>Respuesta disminuida                                                                       | Manipulación difícil<br>Difícil<br>Respuesta exagerada<br>Olfateo continuo<br>Imposible |
| No respuesta                                                                                               | Manipulación difícil<br>Respuesta exagerada<br>Aparta extremidades cuando se le cojen   |
| Relajación intensa<br>Tono en musculatura masetera<br>Espasmos musculares esporádicos                      | Tenso                                                                                   |
| Presente                                                                                                   |                                                                                         |
| Muy disminuida<br>Respiración profunda                                                                     | Aumentados<br>Jadea                                                                     |
| Relajación intensa                                                                                         |                                                                                         |
| Rotado<br>Cerrados<br>Reflejo palpebral disminuido o ausente<br>Reflejo corneal presente<br>Tercer parpado | Excesivamente abiertos<br>Abierto<br>Nistagmo<br>Reflejo palpebral positivo             |
| Desaparece                                                                                                 | Midriasis<br>Centrada                                                                   |
|                                                                                                            | Ladear<br>Aullar<br>Intensa<br>Lloriquea                                                |
|                                                                                                            | Presente                                                                                |

|  |            |
|--|------------|
|  | Congestiva |
|--|------------|
